# Supplementary material
Source: MDPI journal article supplement (https://www.mdpi.com/2071-1050/12/9/3544)

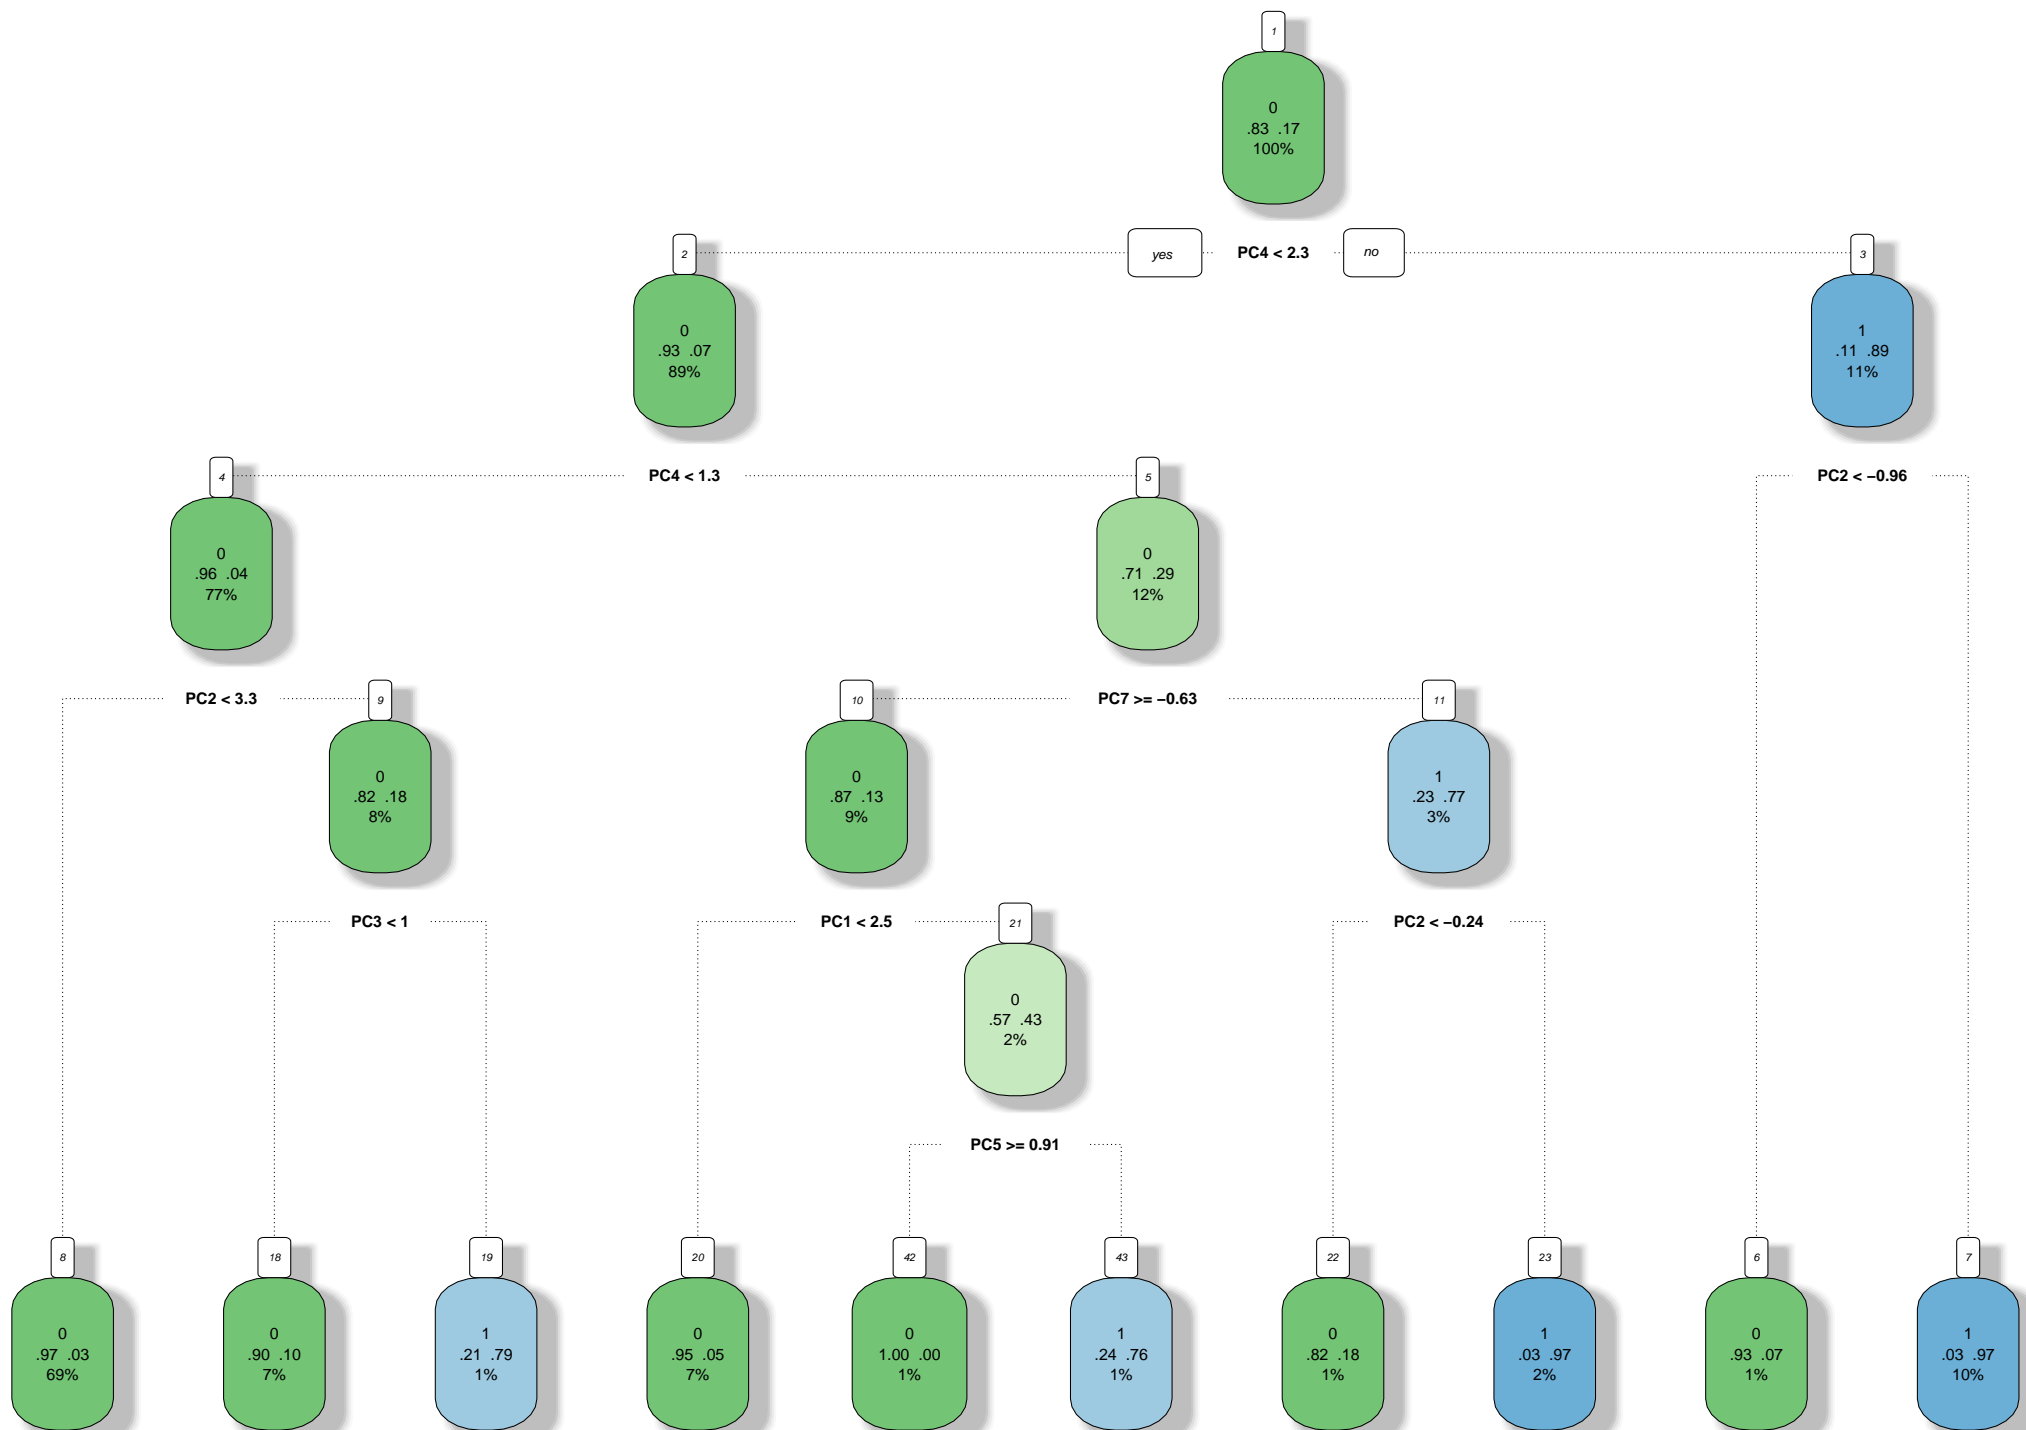

Supplement: s1 [file s1]

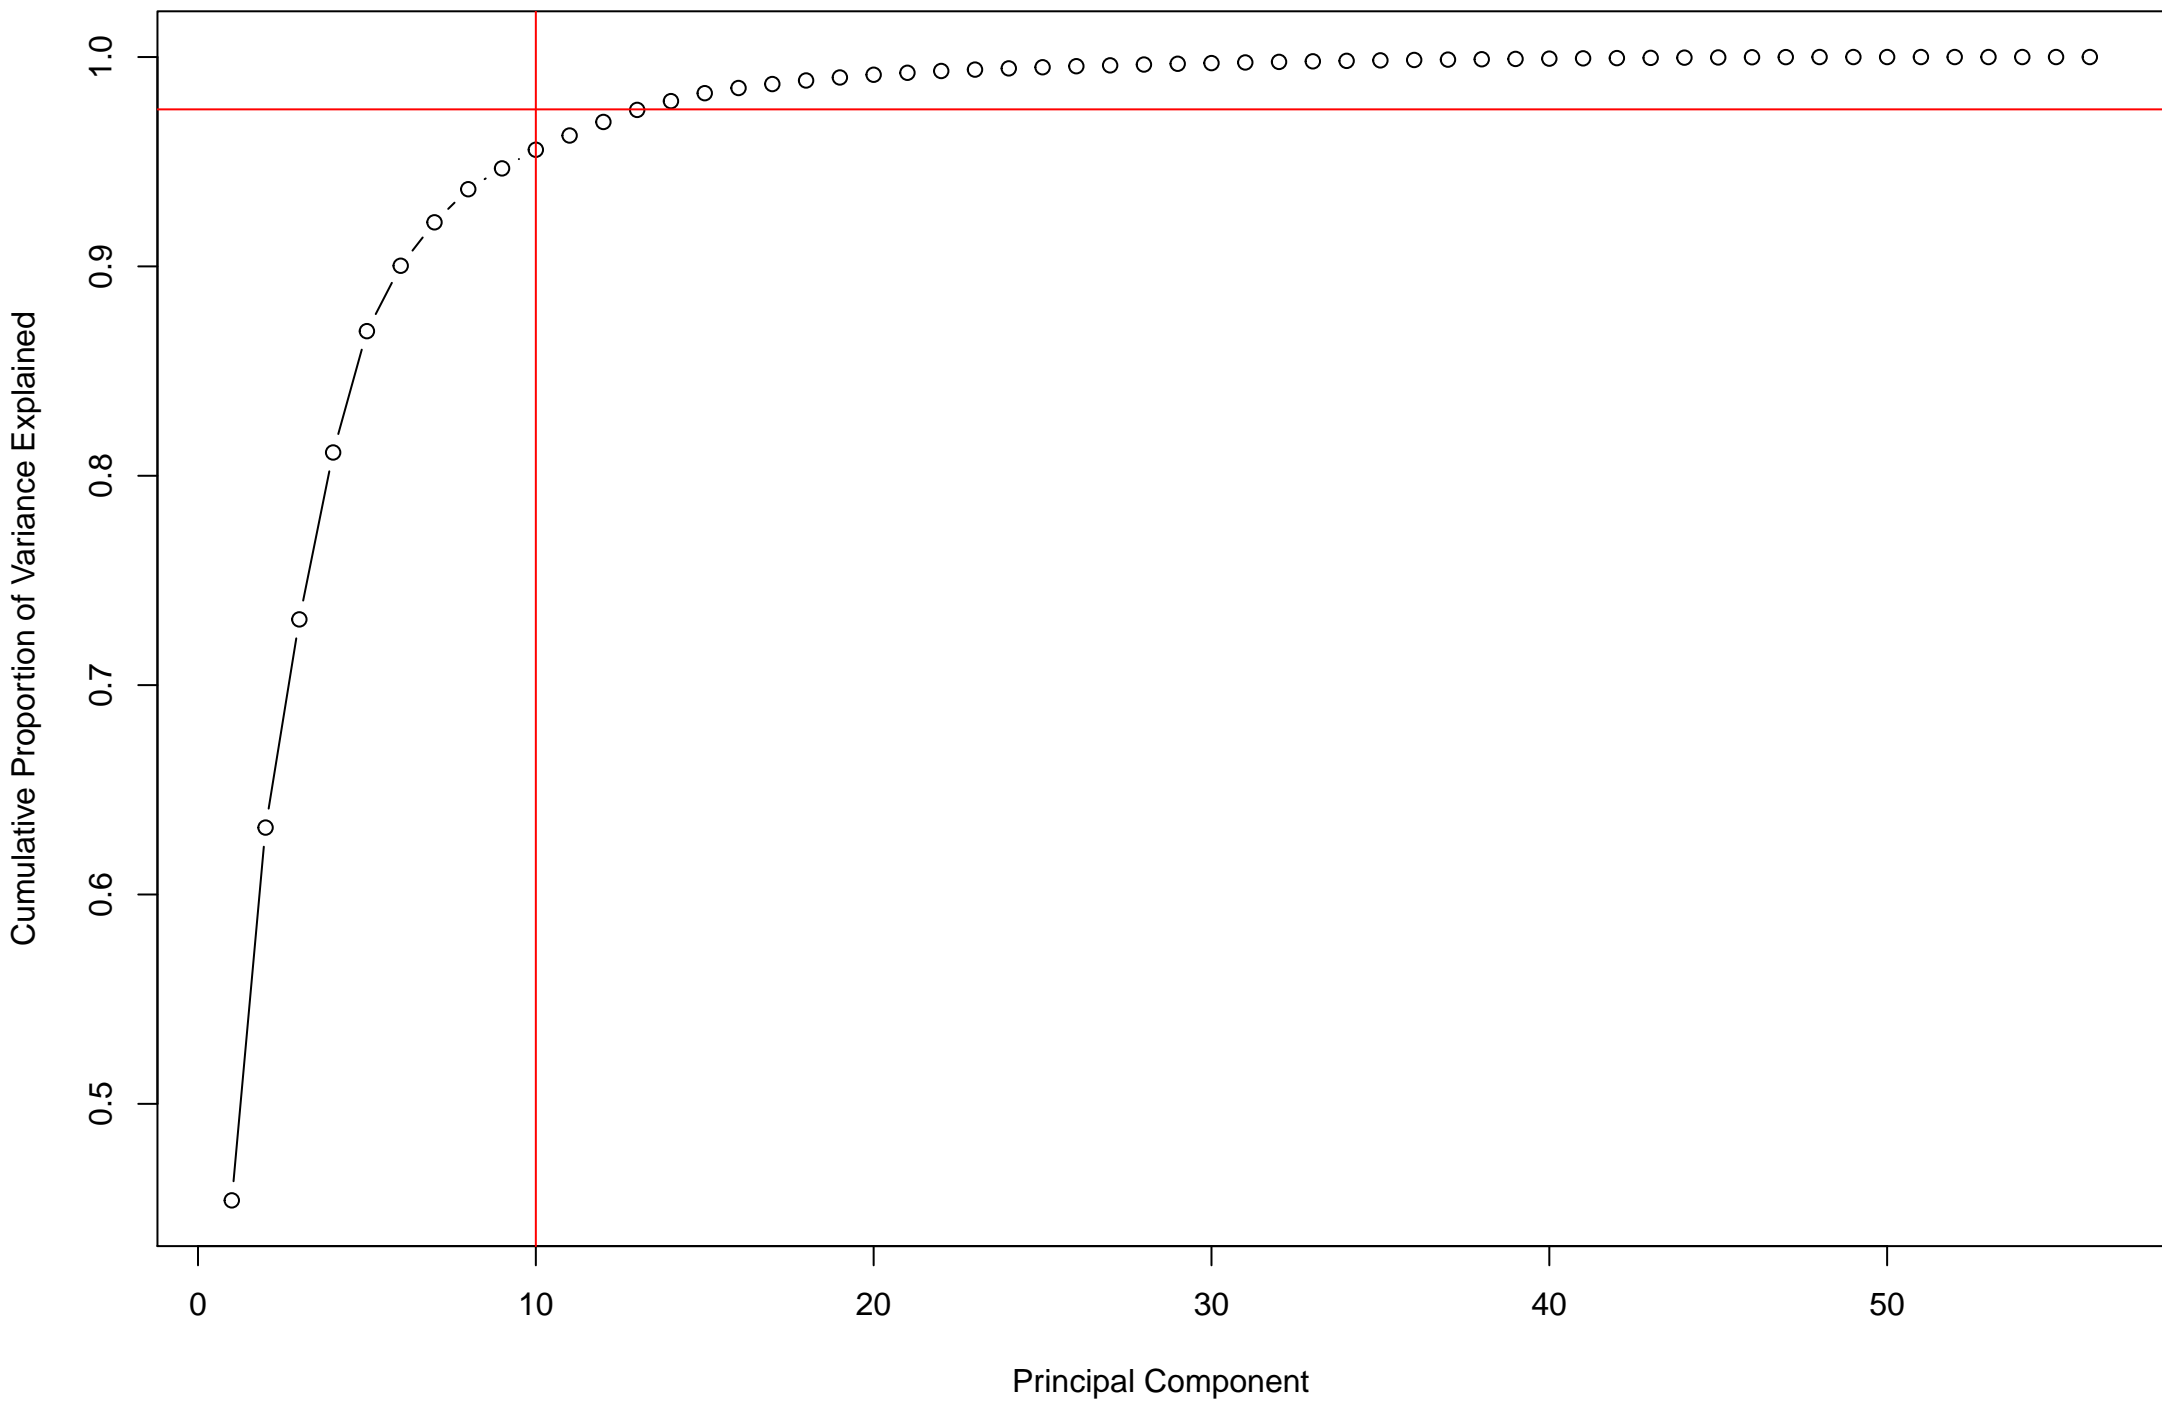

Supplement: s1 [file s1]

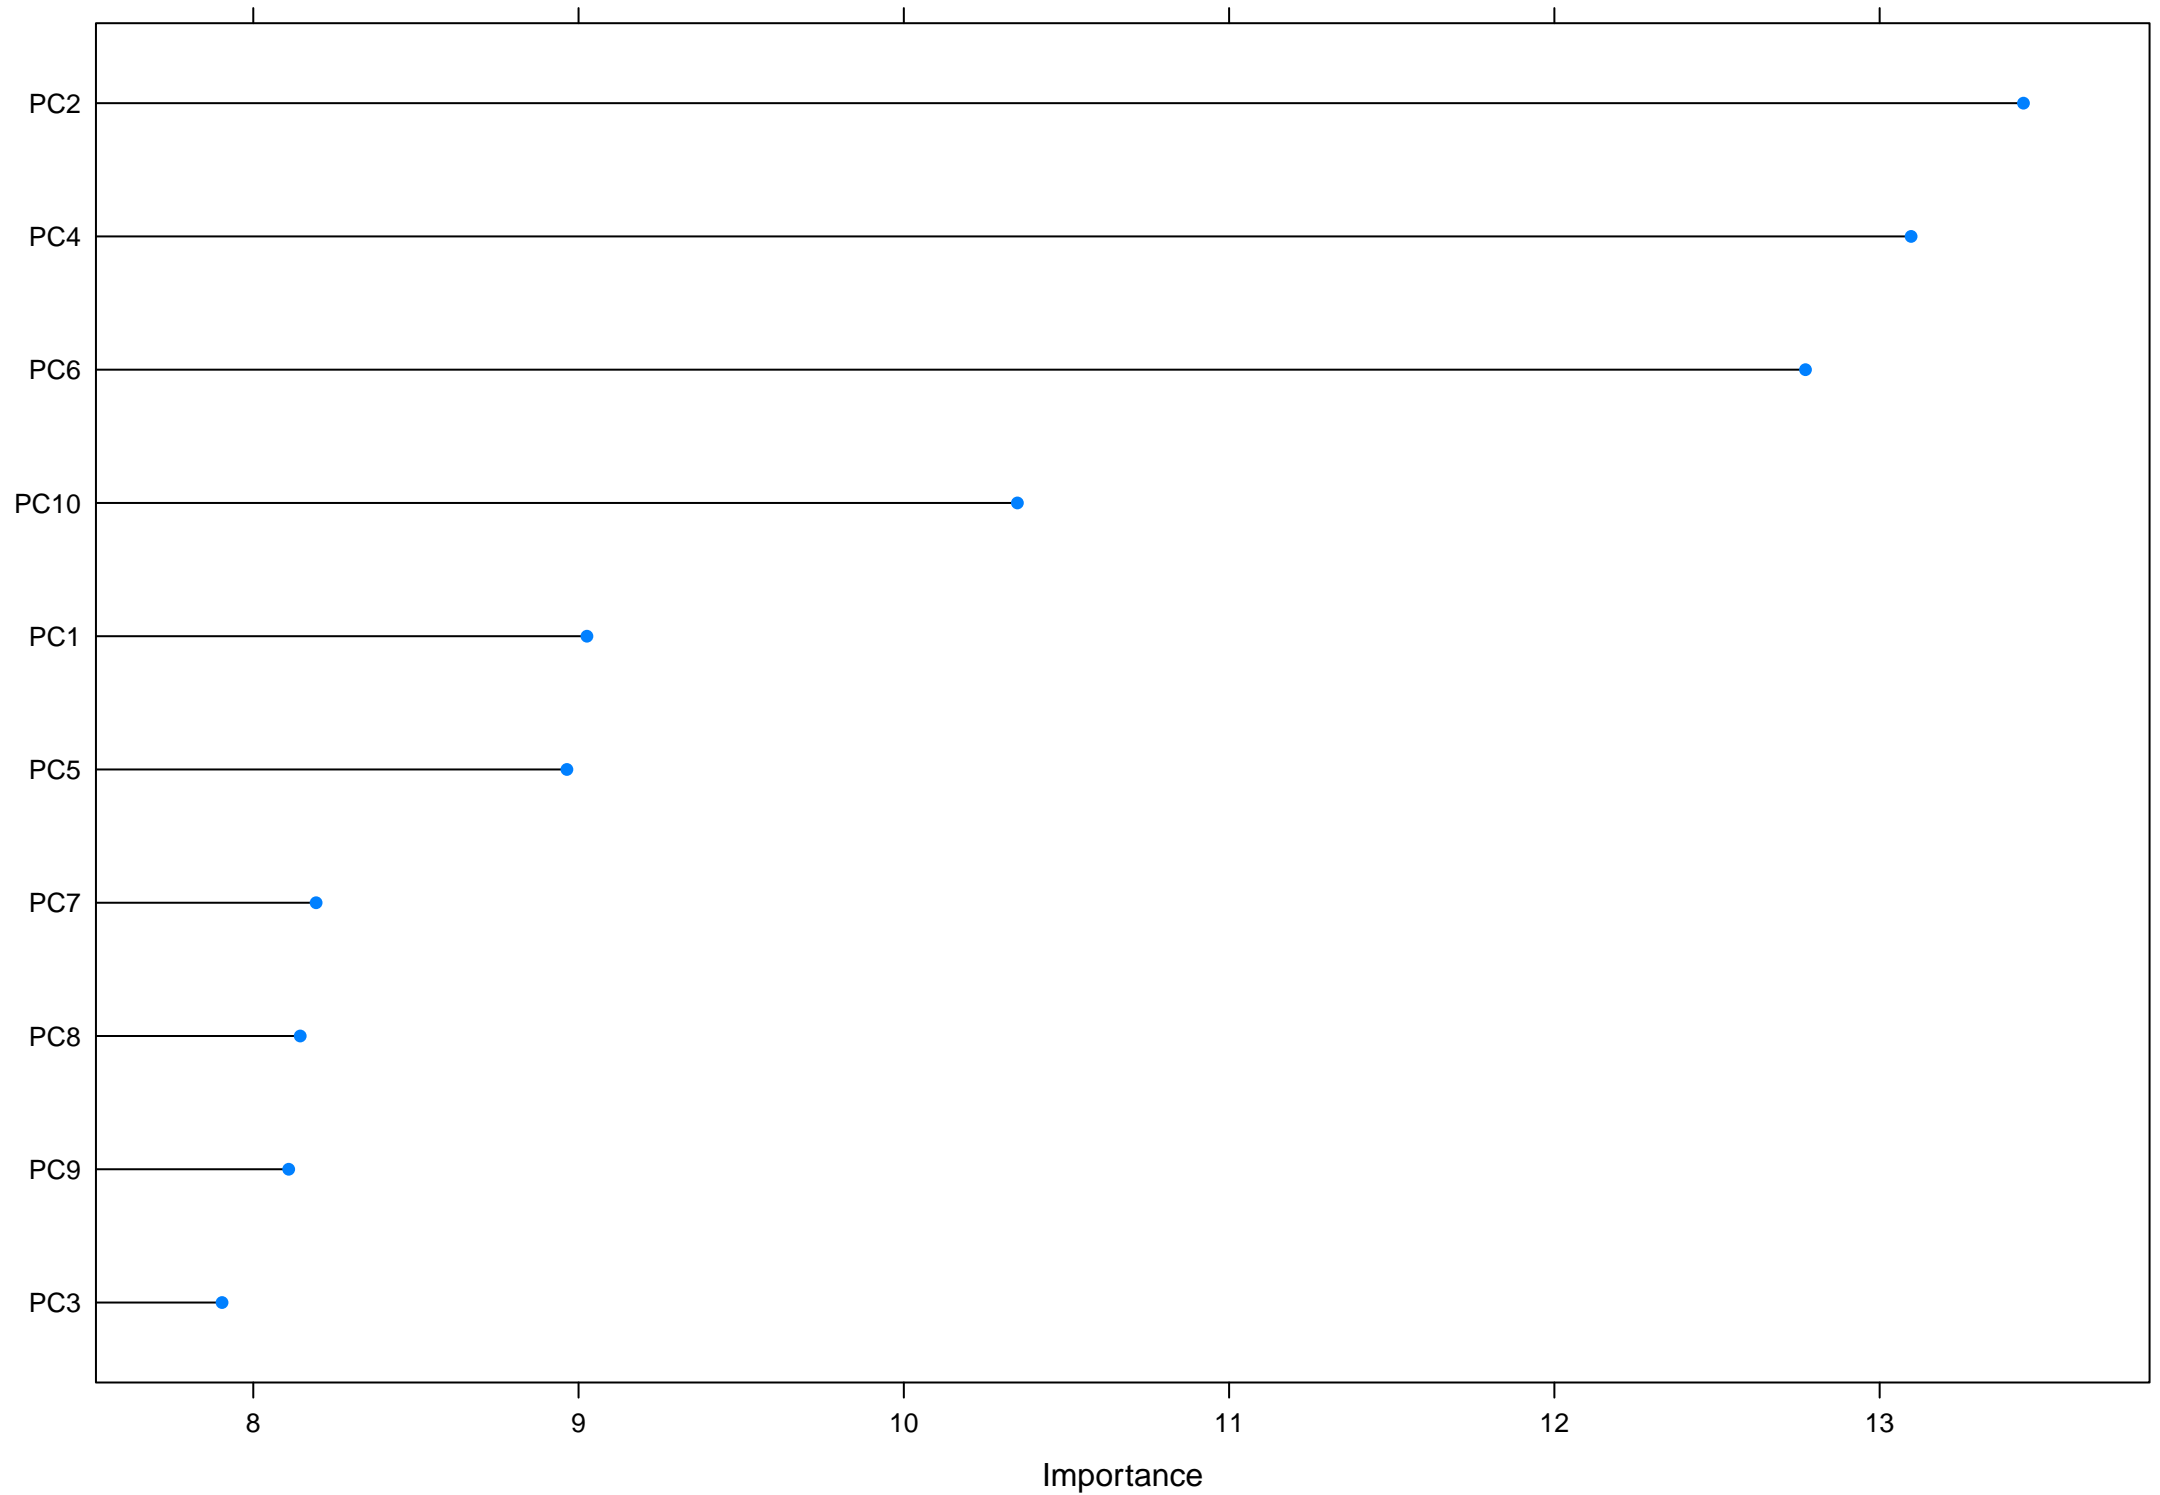

Supplement: s1 [file s1]

# Neural Network

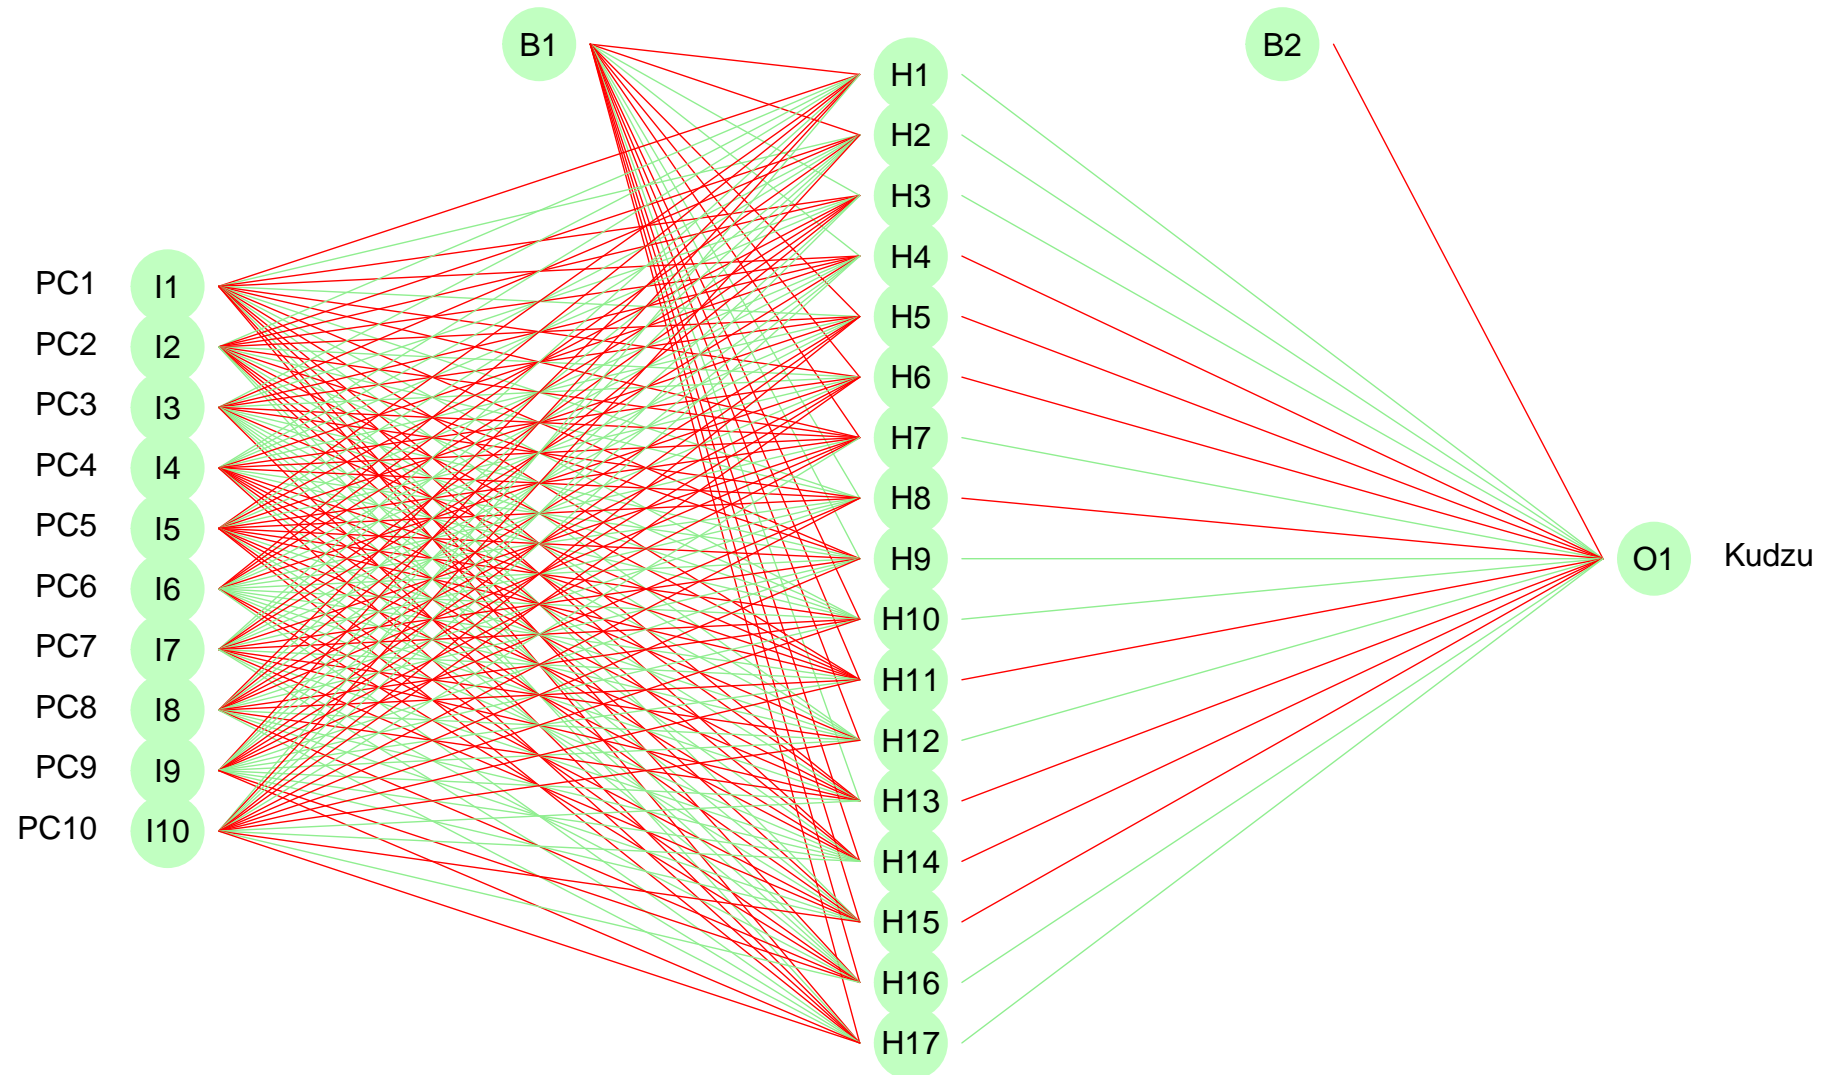

Supplement: s1 [file s1]
